# Supplementary material
Source: PubMed Central journal article supplement (PMC4791628)
Supplement: aasm.39.4.945s1.pdf [file aasm.39.4.945s1.pdf]

**Table S1: Comparison of participants included and non-included in the analysis.**

|                               | Included    | Non included | p      |
|-------------------------------|-------------|--------------|--------|
| n                             | 1,760       | 402          |        |
| <b><i>Demographic</i></b>     |             |              |        |
| Male gender, n (%)            | 862 (49.0)  | 194 (48.3)   | 0.834  |
| Age, y                        | 56.7 (10.7) | 53.8 (10.0)  | <0.001 |
| BMI, kg/m <sup>2</sup>        | 25.7 (4.3)  | 25.4 (4.0)   | 0.204  |
| <b><i>Sleep</i></b>           |             |              |        |
| Total Sleep Time, min         | 400 (72)    | 408 (72)     | 0.025  |
| Sleep efficiency, %           | 84.5 (10.9) | 85.1 (10.8)  | 0.366  |
| SDB, n (%)                    | 657 (37.3)  | 134 (33.3)   | 0.149  |
| Restless legs syndrome, n (%) | 256 (17.5)  | 65 (20.1)    | 0.316  |
| Sleep medication use, n (%)   | 161 (9.3)   | 26 (6.6)     | 0.105  |

BMI, body mass index; AHI, index of apnea-hypopneas per hour of sleep; SDB, moderate-to-severe sleep disordered breathing (AHI  $\geq$  15/h).
